# Supplementary material
Source: Springer Nature journal article supplement (https://www.springermedizin.de/resource/supplementary/13014_2008_146_MOESM2_ESM.pdf/9633142)
Supplement: MOESM2 [file 9633142]

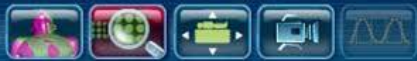

Mode

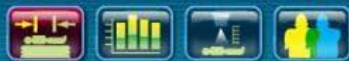

Evaluate functions

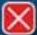

alignrt

Record

Verify

Mr

Patient notes:

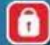

Mid Skintone

B5  
DFP: 89.5  
VERT.10.6

Treatment site:

Date-time stamp:

Other

070706 113503

Page

1

2

Couch Deltas

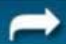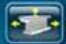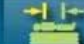

Couch Coordinates

Posture Rotations

$\Delta$ VRT: 0.27 cm

$\Delta$ LNG: 0.38 cm

$\Delta$ LAT: -0.09 cm

$\Delta$ RTN: -0.30°

0.18°

0.60°

RTN: 0.0°

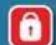

OPTIMISE

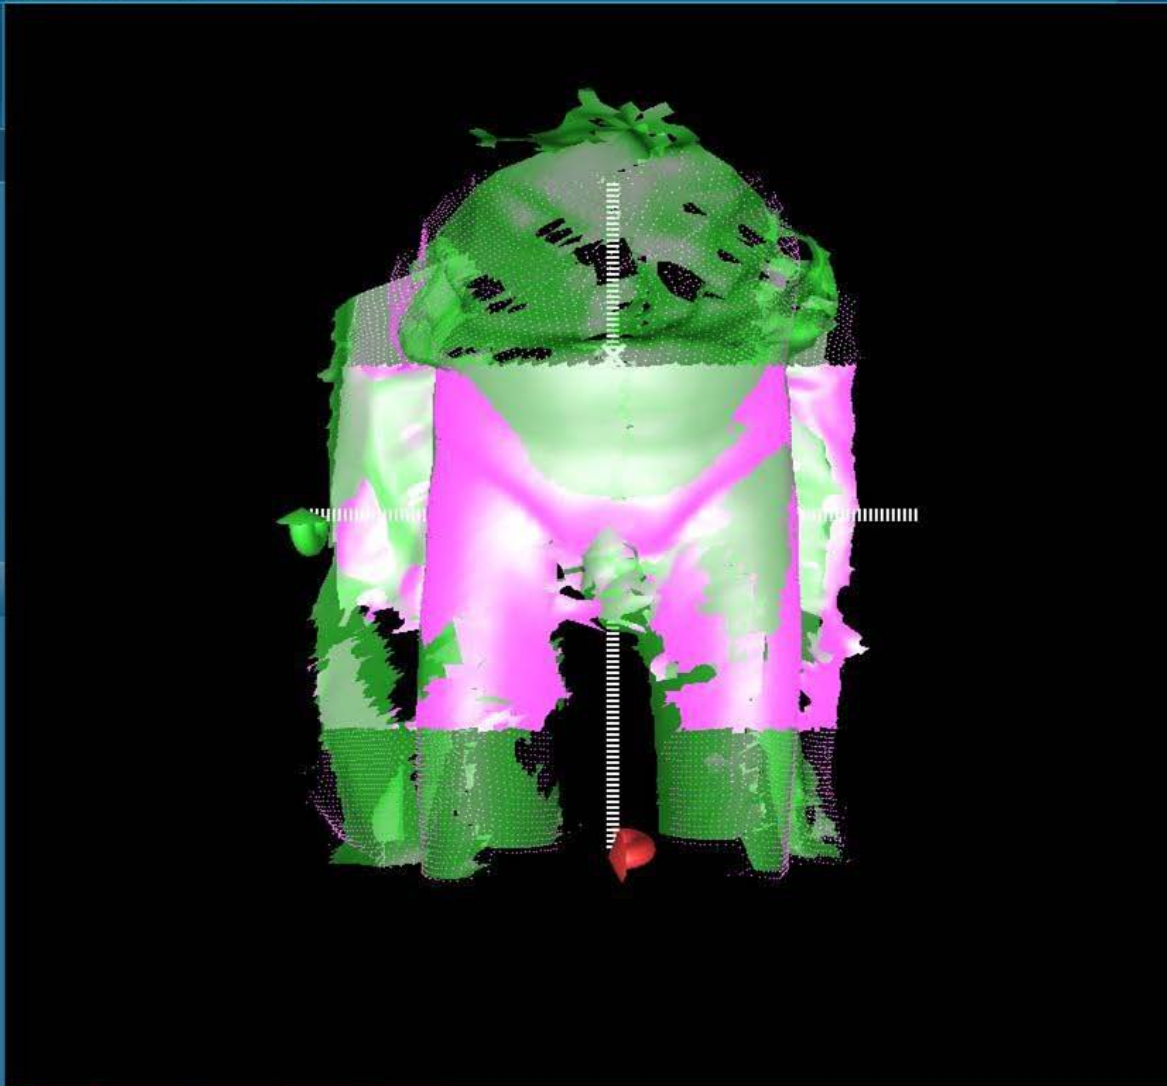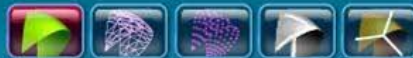

3D Display
